# Supplementary material for: A three-dimensional bi-conductive Si-based anode for high-performance lithium ion batteries
Source: Royal Society of Chemistry journal article supplement (doi:10.1039/d1nj03524j), 2021-01-01
Supplement: d1nj03524j1.pdf [file d1nj03524j1.pdf]

## **Three-dimensional bi-conductive Si-based anode for high-performance lithium ion battery**

Yangqiang Jiang<sup>a,1</sup>, Feng Xiang<sup>a,1</sup>, Shijun Fan<sup>\*a</sup>, Zixu Sun<sup>\*b</sup>,

<sup>a</sup>*Sichuan Changhong Battery Co., Ltd.*

<sup>b</sup>*Key Lab for Special Functional Materials of Ministry of Education, National and Local Joint Engineering Research Center for High-Efficiency Display and Lighting Technology, School of Materials Science and Engineering, Collaborative Innovation Center of Nano Functional Materials and Applications, Henan University, Kaifeng 475004, People's Republic of China*

<sup>1</sup>Y. J. and F. X. contributed equally to this work.

\*Corresponding author.

*E-mail address:* [fsj7254@sina.com](mailto:fsj7254@sina.com) (S. Fan); [sunzixu317@163.com](mailto:sunzixu317@163.com) (Z. Sun);

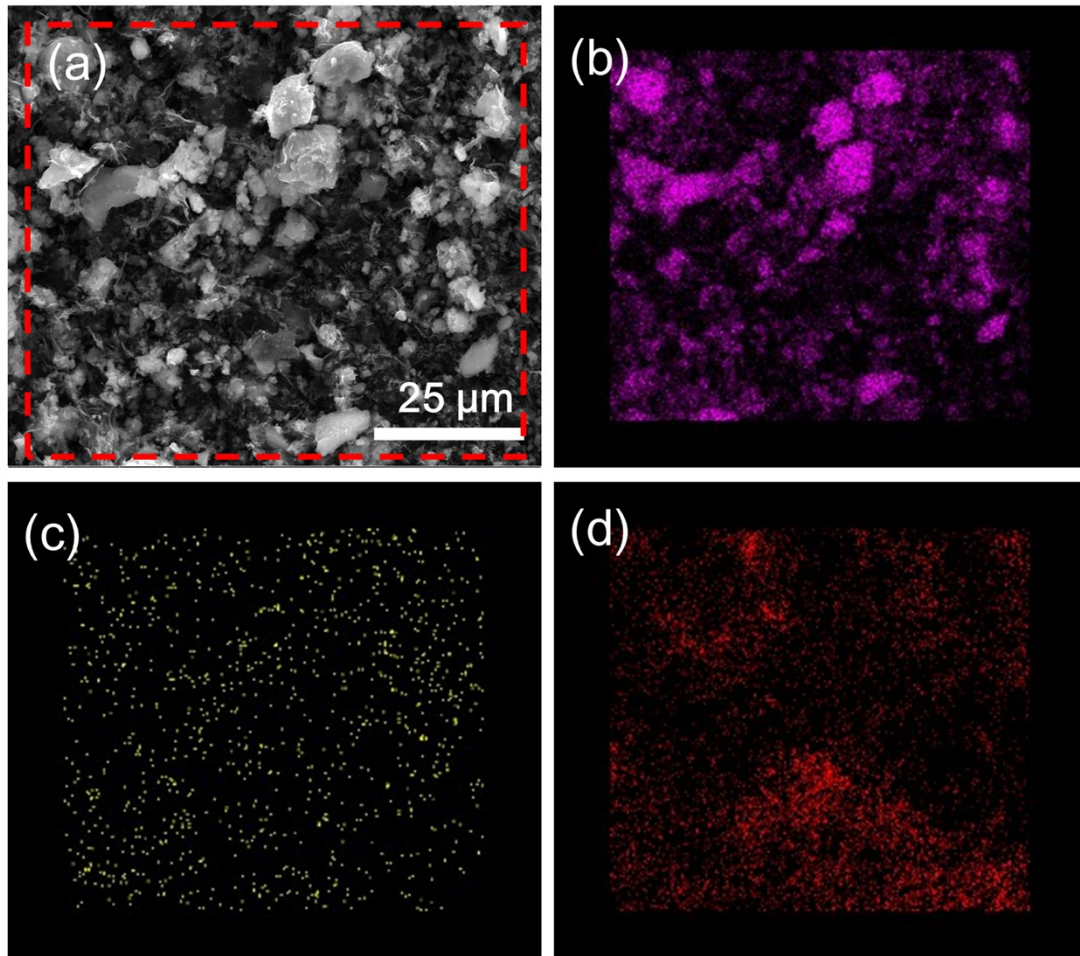

**Fig. S1** (a) EDS mapping of the SCC/RGO/CNT composite, (b) Si, (c) Cu and (d) C.

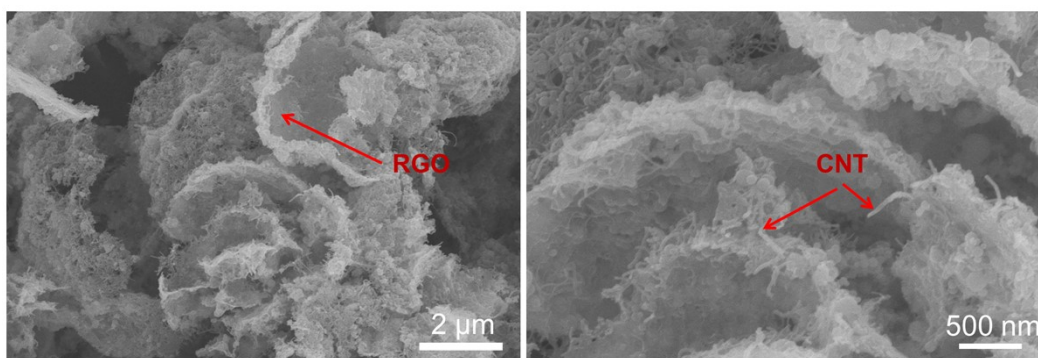

**Fig. S2** SEM image of the 3D SCC/RGO/CNT composite.

**Table. S1** the element content of the SCC/RGO/CNT composite by the EDX.

| Element  | C (K) | Si (K) | Cu (K) |
|----------|-------|--------|--------|
| Weight % | 15.57 | 69.86  | 14.57  |
| Atomic % | 32.25 | 56.78  | 10.97  |

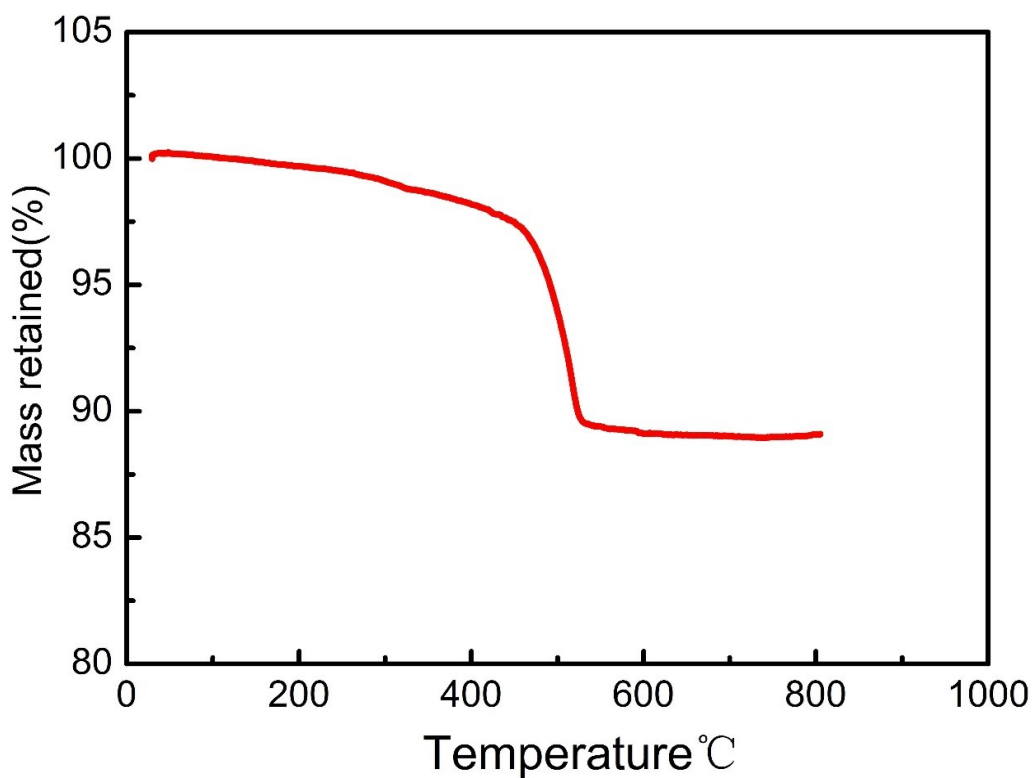

**Fig. S3** TGA curve of the SCC/RGO/CNT composite.

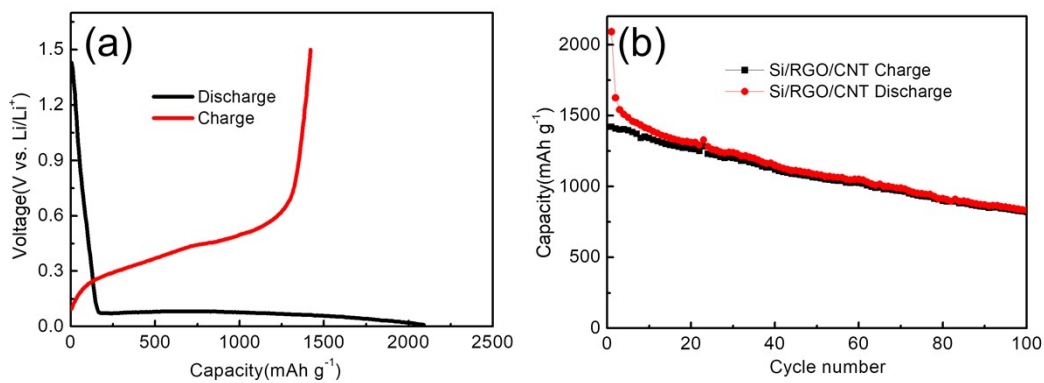

**Fig. S4** (a) The first charge/discharge of the Si/RGO/CNT electrode at 2 A/g, (b) Cycling performance of the Si/RGO/CNT electrode at 2 A/g.

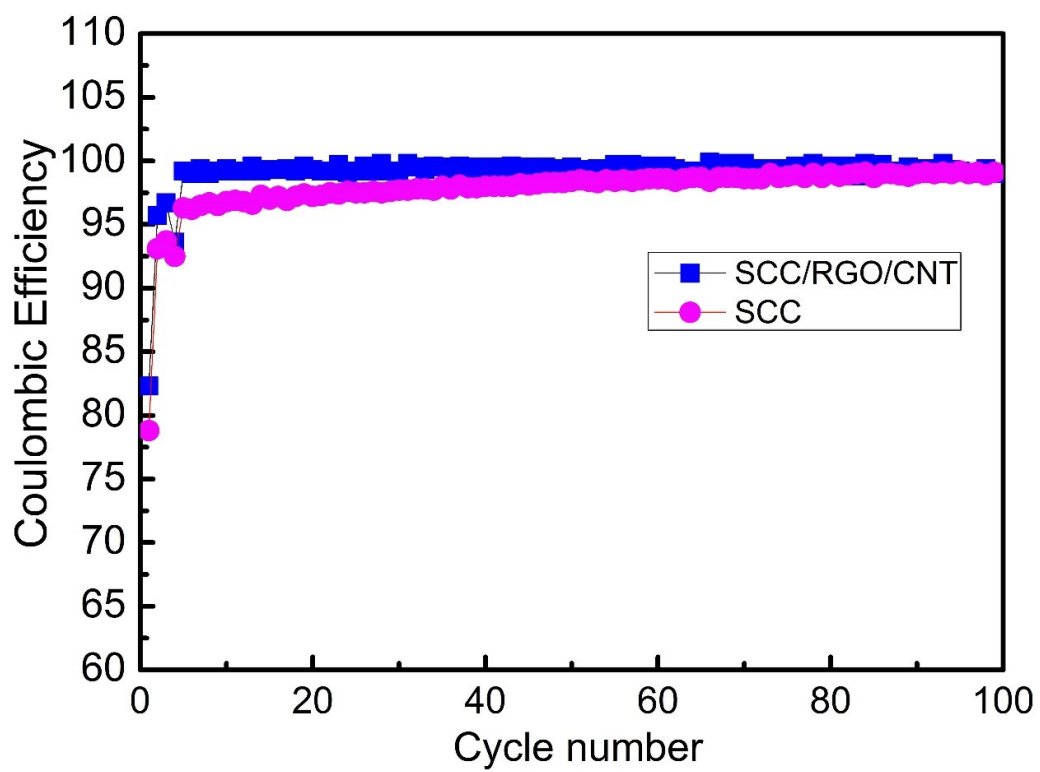

Fig. S5 Coulombic efficiency of the two composites.

**Table. S2** the values of the two composites for the first cycle.

| Composite   | Discharge capacity<br>(mAh/g) | Charge capacity<br>(mAh/g) | CE (%) |
|-------------|-------------------------------|----------------------------|--------|
| SCC         | 3187.9                        | 2511.1                     | 78.8   |
| SCC/RGO/CNT | 2702                          | 2224.9                     | 82.3   |

CE: coulombic efficiency.

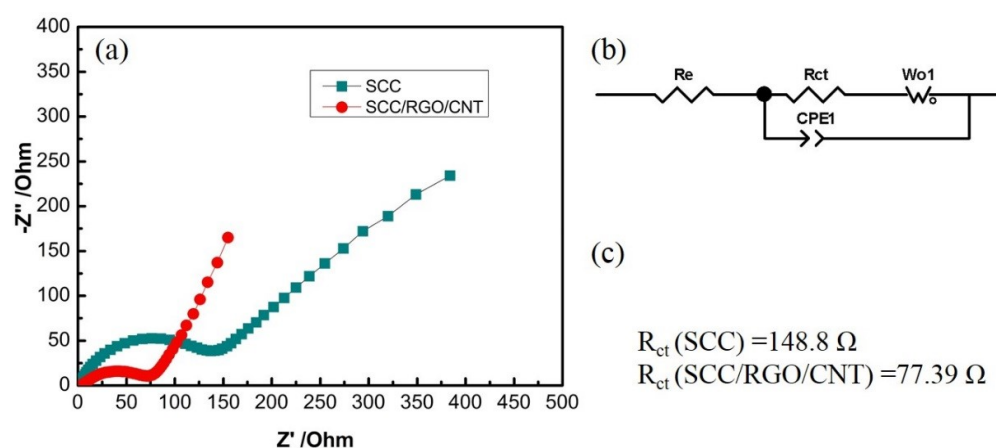

**Fig. S6** (a) Nyquist plots of the two electrodes after one charge-discharge cycle at 50 mA/g. obtained after charging to 1.5 V, (b) the equivalent electrical circuit of two electrodes. (c) The values of  $R_{ct}$  of two electrodes.

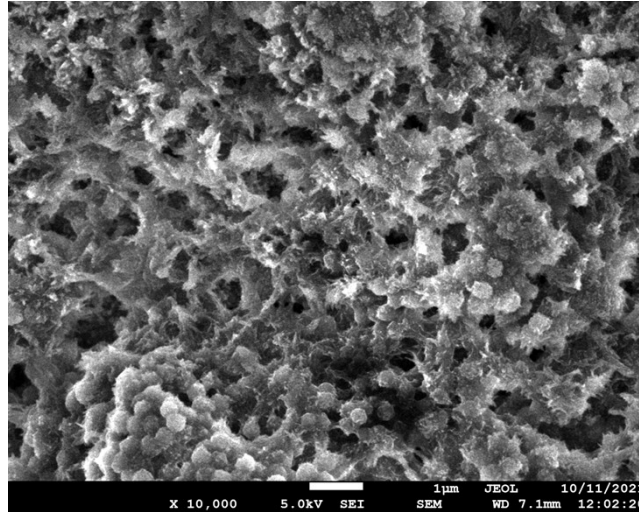

Fig. S7 the SEM image of the electrode after cycling performance.

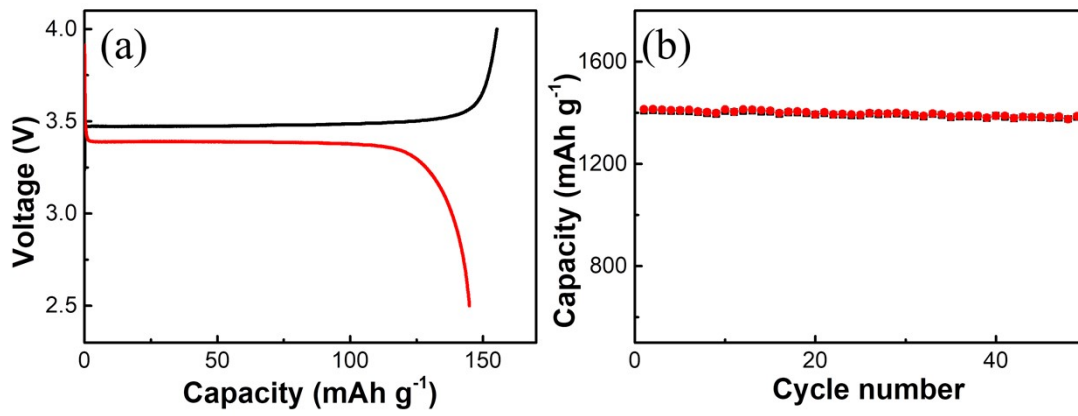

Fig. S8 (a) The charge-discharge profile of the LiFePO<sub>4</sub> electrode. (b) The cycle performance of the full cell at 2 A g<sup>-1</sup>.
